# Supplementary material for: A Novel Technique for Femoral Stem Extraction Through the Direct Anterior Approach: The Medial Episiotomy With Anterior Transfemoral Osteotomy
Source: PubMed Central journal article supplement — Arthroplast Today. 2024 Dec 9;30:101583. doi: 10.1016/j.artd.2024.101583 (PMC11681827; doi:10.1016/j.artd.2024.101583), 2024-12-09
Supplement: mmc2.pdf [file mmc2.pdf]

# CONFLICT OF INTEREST STATEMENT

## *American Association of Hip and Knee Surgeons*

(Adopted from the American Academy of Orthopaedic Surgeons disclosure statement)

The following form **must be filled out completely and submitted by each author (example, 6 authors, 6 forms).**  
**All items require a response. If there is no relevant disclosure for a given item, enter "None."**

---

Manuscript Title    A Novel Technique for Femoral Stem Extraction Through The Direct Anterior Approach: The Medial  
Episiotomy with Anterior Transfemoral Osteotomy

1.     Royalties from a company or supplier (The following conflicts were disclosed)

None

2.     Speakers bureau/paid presentations for a company or supplier (The following conflicts were disclosed)

None

3A.    Paid employee for a company or supplier (The following conflicts were disclosed)

None

3B.    Paid consultant for a company or supplier (The following conflicts were disclosed)

None

3C.    Unpaid consultants for a company or supplier (The following conflicts were disclosed)

None

4.     Stock or stock options in a company or supplier (The following conflicts were disclosed)

None

5.     Research support from a company or supplier as a Principal Investigator (The following conflicts were disclosed)

None

6.     Other financial or material support from a company or supplier (The following conflicts were disclosed)

None

7.     Royalties, financial or material support from publishers (The following conflicts were disclosed)

None

8.     Medical/Orthopaedic publications editorial/governing board (The following conflicts were disclosed)

None

9.     Board member/committee appointments for a society (The following conflicts were disclosed)

None

**Each author must sign AND print or type his/her name, date and submit a separate form**

In addition, one BLINDED Conflict of Interest form (no author names used) should be submitted per manuscript with all author disclosures.

Jamie Henzes



08/09/24

---

Author Name (Print or Type)

Author Signature

Date
