# Supplementary material for: A Novel Technique for Femoral Stem Extraction Through the Direct Anterior Approach: The Medial Episiotomy With Anterior Transfemoral Osteotomy
Source: PubMed Central journal article supplement — Arthroplast Today. 2024 Dec 9;30:101583. doi: 10.1016/j.artd.2024.101583 (PMC11681827; doi:10.1016/j.artd.2024.101583), 2024-12-09
Supplement: mmc3.pdf [file mmc3.pdf]

# CONFLICT OF INTEREST STATEMENT

## *American Association of Hip and Knee Surgeons*

(Adopted from the American Academy of Orthopaedic Surgeons disclosure statement)

The following form **must be filled out completely and submitted by each author (example, 6 authors, 6 forms).**  
**All items require a response. If there is no relevant disclosure for a given item, enter "None."**

---

Manuscript Title A Novel Technique for Femoral Stem Extraction Through The Direct Anterior Approach: The Medial Episiotomy with Anterior Transfemoral Osteotomy

1. Royalties from a company or supplier: None
  
2. Speakers bureau/paid presentations for a company or supplier: None
  
- 3A. Paid employee for a company or supplier: None
  
- 3B. Paid consultant for a company or supplier: None
  
- 3C. Unpaid consultants for a company or supplier: None
  
4. Stock or stock options in a company or supplier: None
  
5. Research support from a company or supplier as a Principal Investigator: None
  
6. Other financial or material support from a company or supplier: None
  
7. Royalties, financial or material support from publishers: None
  
8. Medical/Orthopaedic publications editorial/governing board: None
  
9. Board member/committee appointments for a society: None

**Each author must sign AND print or type his/her name, date and submit a separate form**

In addition, one BLINDED Conflict of Interest form (no author names used) should be submitted per manuscript with all author disclosures.

Muzaffar Ali, DO



11/17/2023

---

Author Name (Print or Type)

Author Signature

Date
