# Supplementary material for: A Novel Technique for Femoral Stem Extraction Through the Direct Anterior Approach: The Medial Episiotomy With Anterior Transfemoral Osteotomy
Source: PubMed Central journal article supplement — Arthroplast Today. 2024 Dec 9;30:101583. doi: 10.1016/j.artd.2024.101583 (PMC11681827; doi:10.1016/j.artd.2024.101583), 2024-12-09
Supplement: mmc5.pdf [file mmc5.pdf]

# CONFLICT OF INTEREST STATEMENT

## *American Association of Hip and Knee Surgeons*

(Adopted from the American Academy of Orthopaedic Surgeons disclosure statement)

The following form **must be filled out completely and submitted by each author (example, 6 authors, 6 forms).**  
**All items require a response. If there is no relevant disclosure for a given item, enter "None."**

---

Manuscript Title    A Novel Technique for Femoral Stem Extraction Through The Direct Anterior Approach: The Medial  
Episiotomy with Anterior Transfemoral Osteotomy

1.     Royalties from a company or supplier: None
  
2.     Speakers bureau/paid presentations for a company or supplier: None
  
- 3A.   Paid employee for a company or supplier: None
  
- 3B.   Paid consultant for a company or supplier: None
  
- 3C.   Unpaid consultants for a company or supplier: None
  
4.     Stock or stock options in a company or supplier: None
  
5.     Research support from a company or supplier as a Principal Investigator: None
  
6.     Other financial or material support from a company or supplier: None
  
7.     Royalties, financial or material support from publishers: None
  
8.     Medical/Orthopaedic publications editorial/governing board: None
  
9.     Board member/committee appointments for a society: None

**Each author must sign AND print or type his/her name, date and submit a separate form**

In addition, one BLINDED Conflict of Interest form (no author names used) should be submitted per manuscript with all author disclosures.

Shaan Sadhwani, DO



11/17/2023

---

Author Name (Print or Type)

Author Signature

Date
